# Supplementary material for: Cross-genera SSR transferability in cacti revealed by a case study using Cereus (Cereeae, Cactaceae)
Source: PubMed Central journal article supplement (PMC6428128; doi:10.1590/1678-4685-gmb-2017-0293), 2019-02-21
Supplement: 1415-4757-GMB-1678-4685-GMB-2017-0293-20190123-suppl2.pdf [file 1415-4757-GMB-1678-4685-GMB-2017-0293-20190123-suppl2.pdf]

Supplementary Material to “Cross-genera SSR transferability in cacti revealed by a case study using *Cereus* (Cereae, Cactaceae)”Table S1 - Characteristics of 20 microsatellite loci tested for transferability in *Cereus* species.

| Source of Species Description | Locus          | Repeat motif                                                                   | Primer Sequence (5' – 3')                                   | Reference                         | PCR Program                          | Annealing Temperature (°C) |
|-------------------------------|----------------|--------------------------------------------------------------------------------|-------------------------------------------------------------|-----------------------------------|--------------------------------------|----------------------------|
|                               | <i>Pchi 21</i> | (AG) <sub>10</sub> (AAG) <sub>2</sub> C(CA) <sub>2</sub>                       | F: CGTTTAGCCCTCTTTCTCC<br>R: GTTCCCAACTGACCGACAAC           | Otero-Arnaiz <i>et al.</i> , 2004 | Touchdown (Don <i>et al.</i> , 1991) | 65°C                       |
| <i>Polaskia chichipe</i>      | <i>Pchi 47</i> | (TC) <sub>10</sub>                                                             | F: GTCCTTGTGGCTAGCCCTTT<br>R: CCATTTCTCTCGCCATCTG           | Otero-Arnaiz <i>et al.</i> , 2004 | Albert and Schmitz, 2002             | 53°C                       |
|                               | <i>Pchi 54</i> | (AG) <sub>4</sub> CG(AG) <sub>11</sub>                                         | F: CCTTGAGCTTTGACATTGAGA<br>R: GGAAGGTTTTCATTGGATGAG        | Otero-Arnaiz <i>et al.</i> , 2004 | Albert and Schmitz, 2002             | 52°C                       |
|                               | <i>mAbR 28</i> | (CT) <sub>5</sub> (AT) <sub>3</sub> (GT) <sub>8</sub> GA(GT) <sub>5</sub>      | F: CCATAAGCTGTGGTGGGTCT<br>R: ATTTTAAAGCTCCCTCCA            | Hughes <i>et al.</i> , 2008       | Albert and Schmitz, 2002             | 52°C                       |
| <i>Ariocarpus bravoanus</i>   | <i>mAbR 42</i> | (TG) <sub>15</sub>                                                             | F: GGGCAATTCCTATGCACAA<br>R: TTGTCCACCTTCCCTATTG            | Hughes <i>et al.</i> , 2008       | Albert and Schmitz, 2002             | 52°C                       |
|                               | <i>mAbR 77</i> | (CA) <sub>5</sub> CG(CA) <sub>5</sub> TG(CA) <sub>22</sub> (TA) <sub>3</sub>   | F: CGGGGAAGGAATAATCCAAG<br>R: ATGTGCCGTTTGCAATCTTT          | Hughes <i>et al.</i> , 2008       | Albert and Schmitz, 2002             | 52°C                       |
|                               | <i>mEgR 02</i> | (AG) <sub>7</sub>                                                              | F: TGGGTTGGAGAAGTGGAAAG<br>R: CGGTGTGAGGCTTCATTTG           | Hardesty <i>et al.</i> , 2008     | Albert and Schmitz, 2002             | 52°C                       |
| <i>Echinocactus grusonii</i>  | <i>mEgR 76</i> | (AG) <sub>10</sub> AC(AG) <sub>2</sub> AC(AG) <sub>7</sub>                     | F: TCACAATTTGGAAGGAAGCA<br>R: GTGAGCAAAGGGCTGATTTTC         | Hardesty <i>et al.</i> , 2008     | Touchdown (Don <i>et al.</i> , 1991) | 65°C                       |
|                               | <i>mEgR 78</i> | (AG) <sub>13</sub> GAG(CA) <sub>3</sub>                                        | F: AGCCCAAAGCCCACTTATT<br>R: TGCATGCAATCATAAGGTTTTT         | Hardesty <i>et al.</i> , 2008     | Albert and Schmitz, 2002             | 52°C                       |
|                               | <i>Pmac82</i>  | (GAG) <sub>5</sub> (GAA) <sub>2</sub> (GAG) <sub>2</sub> GAA(GAG) <sub>2</sub> | F: GTAAAAGAGGAGGATGGAGAGG<br>R: CTTCTTCTTGCTAGGTTTCTCG      | Perez <i>et al.</i> , 2011        | Perez <i>et al.</i> , 2011           | 56°C                       |
|                               | <i>Pmac84</i>  | (AG) <sub>9</sub> CG(AG) <sub>2</sub>                                          | F: CATAAATTGCAGAAATGAGGAC<br>R: AGGTAAACCGCTAACTCGATG       | Perez <i>et al.</i> , 2011        | Perez <i>et al.</i> , 2011           | 60°C                       |
|                               | <i>Pmac85</i>  | (AG) <sub>6</sub> AC(AG) <sub>3</sub> AC(AG) <sub>4</sub>                      | F: CCCCTCACTTCTCCAATCTC<br>R: TCCCTCCTTCTTTTGTGTTC          | Perez <i>et al.</i> , 2011        | Perez <i>et al.</i> , 2011           | 58°C                       |
|                               | <i>Pmac101</i> | (TC) <sub>15</sub> TATG(TA) <sub>3</sub>                                       | F: TGATAGCTGCAACGATGTC<br>R: CATTGTGTTTGTGTTGCTTAC          | Perez <i>et al.</i> , 2011        | Perez <i>et al.</i> , 2011           | 49°C                       |
|                               | <i>Pmac102</i> | (AG) <sub>9</sub>                                                              | F: TCTATAAGTGCCGATGGATGC<br>R: CACACCTCACTCCCAACCTC         | Perez <i>et al.</i> , 2011        | Perez <i>et al.</i> , 2011           | 59°C                       |
| <i>Pilosocereus machrisii</i> | <i>Pmac108</i> | (AG) <sub>14</sub> (TG) <sub>7</sub>                                           | F: TGAATGTCTGCCATTAGAAAGC<br>R: TAATCGCCCAAAGAAGAAC         | Perez <i>et al.</i> , 2011        | Perez <i>et al.</i> , 2011           | 50°C                       |
|                               | <i>Pmac128</i> | (TC) <sub>5</sub> TT(TC) <sub>10</sub> (AC) <sub>10</sub>                      | F: GTGTTGATTGTACTCTTCAG<br>R: CTAACCTTTGTATACATGC           | Perez <i>et al.</i> , 2011        | Perez <i>et al.</i> , 2011           | 59°C                       |
|                               | <i>Pmac130</i> | (AG) <sub>7</sub> CA(AG) <sub>12</sub>                                         | F: GAGGTGCCAATAAATCG<br>R: TGTCACGCAATCTTGAACC              | Perez <i>et al.</i> , 2011        | Perez <i>et al.</i> , 2011           | 58°C                       |
|                               | <i>Pmac135</i> | (TC) <sub>5</sub> TG(TC) <sub>12</sub>                                         | F: ACCAGAATGAGCTCAGCTGTAG<br>R: CCTAGCTAGCAGAATCAGAGTGAAGAC | Perez <i>et al.</i> , 2011        | Perez <i>et al.</i> , 2011           | 60°C                       |
|                               | <i>Pmac146</i> | (AG) <sub>20</sub>                                                             | F: ACCCGACATCCCACTTGTAG<br>R: TAGTCTGAAACGGAGCAAGG          | Perez <i>et al.</i> , 2011        | Perez <i>et al.</i> , 2011           | 54°C                       |
|                               | <i>Pmac149</i> | (TC) <sub>19</sub>                                                             | F: TTCATCCTGCTTTTGAAGTTTG<br>R: TGATGGATTAGGATTGACCTG       | Perez <i>et al.</i> , 2011        | Perez <i>et al.</i> , 2011           | 59°C                       |
