# Supplementary material for: Cross-genera SSR transferability in cacti revealed by a case study using Cereus (Cereeae, Cactaceae)
Source: PubMed Central journal article supplement (PMC6428128; doi:10.1590/1678-4685-gmb-2017-0293), 2019-02-21
Supplement: 1415-4757-GMB-1678-4685-GMB-2017-0293-20190123-suppl3.pdf [file 1415-4757-GMB-1678-4685-GMB-2017-0293-20190123-suppl3.pdf]

## Supplementary Material to “Cross-genera SSR transferability in cacti revealed by a case study using *Cereus* (Cereeae, Cactaceae)”

**Table S2** - Transferability results of the SSR markers for populations S113 (*C. jamacaru*); S115D (*C. insularis*); S80, S104 and S114 (*C. fernambucensis* subsp. *fernambucensis*), S82/S83 and S88 (*C. fernambucensis* subsp. *Sericifer*). The negative (-) and the positive (+) signs mean failure and success in transferability, respectively. The reference source of each locus can be observed in Table S1.

| SSR Locus      | Populations |       |     |      |      |         |     | Allelic Size Range (bp) |          |
|----------------|-------------|-------|-----|------|------|---------|-----|-------------------------|----------|
|                | S113        | S115D | S80 | S104 | S114 | S82/S83 | S88 | Expected                | Observed |
| <i>Pchi 21</i> | -           | -     | -   | -    | -    | -       | -   | 124                     | -        |
| <i>Pchi 47</i> | -           | -     | -   | -    | -    | -       | -   | 120                     | -        |
| <i>Pchi 54</i> | -           | -     | -   | -    | -    | -       | -   | 170                     | -        |
| <i>mAbR 28</i> | +           | +     | +   | +    | +    | +       | +   | 207-222*                | 166-186  |
| <i>mAbR 42</i> | -           | -     | -   | -    | -    | -       | -   | 196-217                 | -        |
| <i>mAbR 77</i> | -           | -     | -   | -    | -    | -       | -   | 346-374                 | -        |
| <i>mEgR 02</i> | +           | +     | +   | +    | +    | +       | +   | 260-280**               | 155-178  |
| <i>mEgR 76</i> | +           | +     | +   | +    | +    | +       | +   | 376-396                 | 360-366  |
| <i>mEgR 78</i> | -           | +     | +   | +    | +    | +       | +   | 148-242***              | 128-252  |
| <i>Pmac82</i>  | +           | +     | +   | +    | +    | +       | +   | 81-93                   | 81-98    |
| <i>Pmac84</i>  | -           | +     | +   | +    | +    | +       | +   | 80-84                   | 76-84    |
| <i>Pmac85</i>  | -           | -     | -   | -    | -    | -       | -   | 90 – 98                 | -        |
| <i>Pmac101</i> | -           | -     | -   | -    | -    | -       | -   | 108-114                 | -        |
| <i>Pmac102</i> | -           | -     | -   | -    | -    | -       | -   | 188 – 120               | -        |
| <i>Pmac108</i> | +           | +     | +   | +    | +    | +       | +   | 109-135                 | 102-130  |
| <i>Pmac128</i> | -           | -     | -   | -    | -    | -       | -   | 138-154                 | -        |
| <i>Pmac130</i> | -           | -     | -   | -    | -    | -       | -   | 141 – 149               | -        |
| <i>Pmac135</i> | -           | -     | -   | -    | -    | -       | -   | 126-140                 | -        |
| <i>Pmac146</i> | -           | +     | +   | +    | +    | +       | +   | 113-155                 | 82-136   |
| <i>Pmac149</i> | +           | -     | -   | -    | -    | -       | -   | 142-154                 | 132-140  |

\*According to Fernandes *et al.* (2016) the expected size was 103-176.

\*\* According to Fernandes *et al.* (2016) the size was < 100.

\*\*\* According to Fernandes *et al.* (2016) the size range was 250-288.
