# Supplementary material for: Cross-genera SSR transferability in cacti revealed by a case study using Cereus (Cereeae, Cactaceae)
Source: PubMed Central journal article supplement (PMC6428128; doi:10.1590/1678-4685-gmb-2017-0293), 2019-02-21
Supplement: 1415-4757-GMB-1678-4685-GMB-2017-0293-20190123-suppl5.pdf [file 1415-4757-GMB-1678-4685-GMB-2017-0293-20190123-suppl5.pdf]

## Supplementary Material to “Cross-genera SSR transferability in cacti revealed by a case study using *Cereus* (Cereaceae, Cactaceae)”

**Table S4** - Private alleles (>10% frequency) found in each loci per population.

| Population | Loci           | Allele | Frequency |
|------------|----------------|--------|-----------|
| S113       | <i>Pmac108</i> | 124    | 0.15      |
|            | <i>Pmac149</i> | 138    | 0.17      |
|            | <i>Pmac149</i> | 140    | 0.72      |
|            | <i>mEgR 02</i> | 156    | 0.12      |
|            | <i>mAbR 28</i> | 186    | 0.11      |
| S82/83     | <i>mEgR 02</i> | 178    | 1.00      |
|            | <i>mEgR 78</i> | 252    | 0.50      |
| S88        | <i>Pmac82</i>  | 82     | 0.20      |
|            | <i>Pmac82</i>  | 85     | 0.10      |
|            | <i>Pmac84</i>  | 76     | 0.25      |
|            | <i>Pmac108</i> | 102    | 0.25      |
|            | <i>Pmac146</i> | 132    | 0.22      |
|            | <i>mEgR 78</i> | 128    | 0.11      |
|            | <i>mEgR 78</i> | 238    | 0.33      |
| S115D      | <i>mEgR 78</i> | 254    | 0.11      |
|            | <i>mEgR 02</i> | 172    | 0.31      |
| S104       | <i>Pmac108</i> | 116    | 0.10      |
|            | <i>mAbR 28</i> | 166    | 0.27      |
| S114       | <i>Pmac84</i>  | 84     | 0.12      |
|            | <i>Pmac146</i> | 116    | 0.35      |
