# Supplementary material for: Cross-genera SSR transferability in cacti revealed by a case study using Cereus (Cereeae, Cactaceae)
Source: PubMed Central journal article supplement (PMC6428128; doi:10.1590/1678-4685-gmb-2017-0293), 2019-02-21
Supplement: 1415-4757-GMB-1678-4685-GMB-2017-0293-20190123-suppl6.pdf [file 1415-4757-GMB-1678-4685-GMB-2017-0293-20190123-suppl6.pdf]

## Supplementary Material to “Cross-genera SSR transferability in cacti revealed by a case study using *Cereus* (Cereeae, Cactaceae)”

**Table S5** - F-statistics by locus for all populations and  $F_{ST}$  corrected by ENA method (Chapuis and Estoup, 2007).

| SSR Locus      | $F_{IT}$ | $F_{IS}$ | $F_{ST}$ | $F_{ST}$ Corrected |
|----------------|----------|----------|----------|--------------------|
| <i>Pmac82</i>  | 0.13     | 0.04     | 0.09     | 0.12               |
| <i>Pmac84</i>  | 0.35     | -0,16    | 0.43     | 0.43               |
| <i>Pmac108</i> | 0.23     | -0,25    | 0.38     | 0.38               |
| <i>Pmac146</i> | 0.36     | -0,02    | 0.37     | 0.35               |
| <i>mEgR 02</i> | 0.78     | -0,03    | 0.79     | 0.79               |
| <i>mEgR 76</i> | 1,00     | 1,00     | 0.71     | 0.64               |
| <i>mEgR 78</i> | 0.29     | -0,41    | 0.49     | 0.46               |
| <i>mAbR 28</i> | 0.33     | 0.19     | 0.17     | 0.19               |

$F_{ST}$  global = 0.44 /  $F_{ST}$  corrected (95% confidence interval (CI) 0.33 to 0.57)
