# Supplementary material for: Cross-genera SSR transferability in cacti revealed by a case study using Cereus (Cereeae, Cactaceae)
Source: PubMed Central journal article supplement (PMC6428128; doi:10.1590/1678-4685-gmb-2017-0293), 2019-02-21
Supplement: 1415-4757-GMB-1678-4685-GMB-2017-0293-20190123-suppl7.pdf [file 1415-4757-GMB-1678-4685-GMB-2017-0293-20190123-suppl7.pdf]

## Supplementary Material to “Cross-genera SSR transferability in cacti revealed by a case study using *Cereus* (Cereeae, Cactaceae)”

**Table S6** - Results of a literature survey (up to April/2017) for articles on Cactaceae SSR transferability in ISI Web of Science.

| <b>Keywords*</b>                                    | <b>Type</b> | <b>N° of article</b> | <b>Authors</b>                                                                                                                                                                                                                                                                                                                              |
|-----------------------------------------------------|-------------|----------------------|---------------------------------------------------------------------------------------------------------------------------------------------------------------------------------------------------------------------------------------------------------------------------------------------------------------------------------------------|
| <i>Microsatellite transferability</i>               | Topic       | 855                  | -                                                                                                                                                                                                                                                                                                                                           |
| <i>Microsatellite cross-amplification</i>           | Topic       | 727                  | -                                                                                                                                                                                                                                                                                                                                           |
| <i>Cactaceae microsatellite transferability</i>     | Topic       | 2                    | Monteiro <i>et al.</i> , (2015) <i>Biochem Syst Ecol</i> 58:7-12<br>Fernandes <i>et al.</i> , (2016) <i>Biochem Syst Ecol</i> 64:38-45<br>Otero-Arnaiz <i>et al.</i> , (2004) <i>Mol Ecol Notes</i> 4:265-267<br>Solorzano <i>et al.</i> , (2009) <i>Mol Ecol Res</i> 9:156–158<br>Perez <i>et al.</i> , (2011) <i>Am J Bot</i> 98:204-206. |
| <i>Cactaceae microsatellite cross-amplification</i> | Topic       | 7                    | Moraes <i>et al.</i> , (2012) <i>Genetica</i> 140:277–285<br>Moraes <i>et al.</i> , (2014) <i>Genet Mol Res</i> 13: 10359-10366<br>Bonatelli <i>et al.</i> , (2015) <i>PLoS ONE</i> 23:3044–3063<br>Fava <i>et al.</i> , (2016) <i>Biochem Syst Ecol</i> 66:19-23                                                                           |

\*Note: A similar search was performed using the SSR term rather than microsatellite and the same results were retrieved.
